# Supplementary material
Source: PubMed Central journal article supplement (PMC4503649)
Supplement: 14_199_Wen.Suppl.pdf [file 14_199_Wen.Suppl.pdf]

Supplemental Data

Acetylbritannilactone Modulates MicroRNA-155-Mediated Inflammatory Response in Ischemic Cerebral Tissues

Ya Wen,<sup>1,2,3</sup> Xiangjian Zhang,<sup>1,2,3</sup> Lipeng Dong,<sup>1,2</sup> Jingru Zhao,<sup>1,2</sup> Cong Zhang,<sup>1,2</sup> and Chunhua Zhu<sup>1,2,3</sup>

<sup>1</sup>Department of Neurology, Second Hospital of Hebei Medical University, Shijiazhuang, Hebei, PR China; <sup>2</sup>Hebei Key Laboratory for Neurology, Shijiazhuang, Hebei, PR China; and <sup>3</sup>Hebei Collaborative Innovation Center for Cardio-cerebrovascular Disease, Shijiazhuang, Hebei, PR China

Online address: <http://www.molmed.org>

The Feinstein Institute for Medical Research North Shore LIJ  
Empowering Imagination. Pioneering Discovery.®

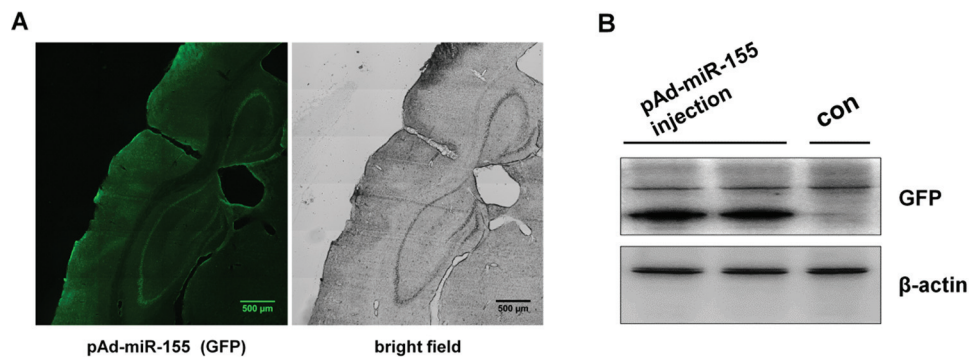

**Supplementary Figure S1.** (A) The widespread of miR-155 in the brain after the stereotactic injections of pAd-miR-155 into LV. Left, miR-155 was widely expression in the whole mouse brain, especially in cortex and hippocampus, as assessed by the fluorescence intensity of the transfected pAd-miR-155 tagged with GFP. Right, bright field of the brain after the stereotactic injections of pAd-miR-155. (B) miR-155 levels were increased in the brain after 24 h of delivery of pAd-miR-155. Western blotting means the expression of the transfected pAd-miR-155 tagged with GFP using anti-GFP antibody, showing that the introduced pAd-miR-155 tagged with GFP was highly expressed in the brain tissues after 24 h of delivery of pAd-miR-155.
